# Supplementary material
Source: publisher site journal article supplement (https://en-cdn.bio-protocol.org/attached/file/20200531/Supplemental.xlsx)
Supplement: Supplementary file 1 [file Supplemental.xlsx]

## Sheet: Sheet1
Index Primer 1	5’ to 3’ Sequence (9-nt indices with lower case)
P7-i (i=1, 2, …)
P7-1	CAAGCAGAAGACGGCATACGAGATcggttggttGTCTCGTGGGCTCGG
P7-2	CAAGCAGAAGACGGCATACGAGATacttcggttGTCTCGTGGGCTCGG
P7-3	CAAGCAGAAGACGGCATACGAGATatggttcttGTCTCGTGGGCTCGG
P7-4	CAAGCAGAAGACGGCATACGAGATtggagatggGTCTCGTGGGCTCGG
P7-5	CAAGCAGAAGACGGCATACGAGATtctctgaggGTCTCGTGGGCTCGG
P7-6	CAAGCAGAAGACGGCATACGAGATtggttcaggGTCTCGTGGGCTCGG
P7-7	CAAGCAGAAGACGGCATACGAGATtacggatccGTCTCGTGGGCTCGG
P7-8	CAAGCAGAAGACGGCATACGAGATccaaccgccGTCTCGTGGGCTCGG
P7-9	CAAGCAGAAGACGGCATACGAGATgaactataaGTCTCGTGGGCTCGG
P7-10	CAAGCAGAAGACGGCATACGAGATatccttcaaGTCTCGTGGGCTCGG
P7-11	CAAGCAGAAGACGGCATACGAGATctcagtcttGTCTCGTGGGCTCGG
P7-12	CAAGCAGAAGACGGCATACGAGATcggaatattGTCTCGTGGGCTCGG
P7-13	CAAGCAGAAGACGGCATACGAGATactcttggtGTCTCGTGGGCTCGG
P7-14	CAAGCAGAAGACGGCATACGAGATtaacgaagtGTCTCGTGGGCTCGG
P7-15	CAAGCAGAAGACGGCATACGAGATcttcgttctGTCTCGTGGGCTCGG
P7-16	CAAGCAGAAGACGGCATACGAGATaagagttctGTCTCGTGGGCTCGG
P7-17	CAAGCAGAAGACGGCATACGAGATagttcttctGTCTCGTGGGCTCGG
P7-18	CAAGCAGAAGACGGCATACGAGATgattgaactGTCTCGTGGGCTCGG
P7-19	CAAGCAGAAGACGGCATACGAGATctggagcatGTCTCGTGGGCTCGG
P7-20	CAAGCAGAAGACGGCATACGAGATagcattctgGTCTCGTGGGCTCGG
P7-21	CAAGCAGAAGACGGCATACGAGATctacctctgGTCTCGTGGGCTCGG
P7-22	CAAGCAGAAGACGGCATACGAGATgtaccaaggGTCTCGTGGGCTCGG
P7-23	CAAGCAGAAGACGGCATACGAGATaccgaggcgGTCTCGTGGGCTCGG
P7-24	CAAGCAGAAGACGGCATACGAGATtcgttagcgGTCTCGTGGGCTCGG
P7-25	CAAGCAGAAGACGGCATACGAGATcgccaaccgGTCTCGTGGGCTCGG
P7-26	CAAGCAGAAGACGGCATACGAGATataccggagGTCTCGTGGGCTCGG
P7-27	CAAGCAGAAGACGGCATACGAGATaacctagagGTCTCGTGGGCTCGG
P7-28	CAAGCAGAAGACGGCATACGAGATgcttggaagGTCTCGTGGGCTCGG
P7-29	CAAGCAGAAGACGGCATACGAGATgtaaccttcGTCTCGTGGGCTCGG
P7-30	CAAGCAGAAGACGGCATACGAGATgaggacttcGTCTCGTGGGCTCGG
P7-31	CAAGCAGAAGACGGCATACGAGATgaagcgatcGTCTCGTGGGCTCGG
P7-32	CAAGCAGAAGACGGCATACGAGATgttcgcatcGTCTCGTGGGCTCGG
P7-33	CAAGCAGAAGACGGCATACGAGATgccagcggcGTCTCGTGGGCTCGG
P7-34	CAAGCAGAAGACGGCATACGAGATtactccagcGTCTCGTGGGCTCGG
P7-35	CAAGCAGAAGACGGCATACGAGATagataatacGTCTCGTGGGCTCGG
P7-36	CAAGCAGAAGACGGCATACGAGATacggttgacGTCTCGTGGGCTCGG
P7-37	CAAGCAGAAGACGGCATACGAGATatcaaggacGTCTCGTGGGCTCGG
P7-38	CAAGCAGAAGACGGCATACGAGATttagccgacGTCTCGTGGGCTCGG
P7-39	CAAGCAGAAGACGGCATACGAGATcctaacctaGTCTCGTGGGCTCGG
P7-40	CAAGCAGAAGACGGCATACGAGATggcaggcgaGTCTCGTGGGCTCGG
P7-41	CAAGCAGAAGACGGCATACGAGATgcggcgcgaGTCTCGTGGGCTCGG
P7-42	CAAGCAGAAGACGGCATACGAGATgatatccgaGTCTCGTGGGCTCGG
P7-43	CAAGCAGAAGACGGCATACGAGATgagtcaagaGTCTCGTGGGCTCGG
P7-44	CAAGCAGAAGACGGCATACGAGATtcaggttcaGTCTCGTGGGCTCGG
P7-45	CAAGCAGAAGACGGCATACGAGATgccgactcaGTCTCGTGGGCTCGG
P7-37	CAAGCAGAAGACGGCATACGAGATcggttggttGTCTCGTGGGCTCGG
P7-38	CAAGCAGAAGACGGCATACGAGATacttcggttGTCTCGTGGGCTCGG
P7-39	CAAGCAGAAGACGGCATACGAGATatggttcttGTCTCGTGGGCTCGG
P7-40	CAAGCAGAAGACGGCATACGAGATtggagatggGTCTCGTGGGCTCGG
P7-41	CAAGCAGAAGACGGCATACGAGATtctctgaggGTCTCGTGGGCTCGG
P7-42	CAAGCAGAAGACGGCATACGAGATtggttcaggGTCTCGTGGGCTCGG
P7-43	CAAGCAGAAGACGGCATACGAGATtacggatccGTCTCGTGGGCTCGG
P7-44	CAAGCAGAAGACGGCATACGAGATccaaccgccGTCTCGTGGGCTCGG
P7-45	CAAGCAGAAGACGGCATACGAGATgaactataaGTCTCGTGGGCTCGG
Index Primer 2	5’ to 3’ Sequence (9-nt indices with lower case)
P5-j (j=1, 2, …)
P5-1	AATGATACGGCGACCACCGAGATCTACACaaccatggaTCGTCGGCAGCGTC
P5-2	AATGATACGGCGACCACCGAGATCTACACaaccgccaaTCGTCGGCAGCGTC
P5-3	AATGATACGGCGACCACCGAGATCTACACccatagacgTCGTCGGCAGCGTC
P5-4	AATGATACGGCGACCACCGAGATCTACACccattgcatTCGTCGGCAGCGTC
P5-5	AATGATACGGCGACCACCGAGATCTACACggatatcctTCGTCGGCAGCGTC
P5-6	AATGATACGGCGACCACCGAGATCTACACggcgaatcaTCGTCGGCAGCGTC
P5-7	AATGATACGGCGACCACCGAGATCTACACttgagagcgTCGTCGGCAGCGTC
P5-8	AATGATACGGCGACCACCGAGATCTACACttgctgcgtTCGTCGGCAGCGTC
P5-9	AATGATACGGCGACCACCGAGATCTACACaagaccagaTCGTCGGCAGCGTC
P5-10	AATGATACGGCGACCACCGAGATCTACACagtaatgatTCGTCGGCAGCGTC
P5-11	AATGATACGGCGACCACCGAGATCTACACctggaacgcTCGTCGGCAGCGTC
P5-12	AATGATACGGCGACCACCGAGATCTACACgaaggacggTCGTCGGCAGCGTC
P5-13	AATGATACGGCGACCACCGAGATCTACACgttgcatcgTCGTCGGCAGCGTC
P5-14	AATGATACGGCGACCACCGAGATCTACACtctatccttTCGTCGGCAGCGTC
